# Supplementary material for: Microwave-assisted Negishi and Kumada cross-coupling reactions of aryl chloridesElectronic supplementary information (ESI) available: Experimental procedures and spectral data. See http://www.rsc.org/suppdata/cc/b3/b313887a/
Source: Royal Society of Chemistry journal article supplement (doi:10.1039/b313887a), 2004-01-01
Supplement: b313887a.doc [file b313887a.doc]

**Microwave-Assisted Negishi and Kumada Cross-Coupling Reactions of Aryl Chlorides**

- Electronical supplementary information

**General conditions:**

- Tetrahydrofuran (THF) was dried by distilling from sodium-benzophenone ketyl under argon atmosphere prior to use. N-methyl-2-pyrrolidinone (NMP, anhydrous 99.5 %, Aldrich, Cat. No.: 32,863-4) used as received.
- All starting materials were purchased from commercial sources and used as received or were synthesized as described in the cited references.
- Magnesium turnings from older source were washed with diluted aqueous muriatic acid till silver like appearance occurred (around 10 minutes), filtered, washed with ethanol and finally with ether. Dried at 20 mbar at 50°C for circa 30 minutes.
- TLC analysis was performed on Merck precoated 60 F254 plates.
- Flash column chromatography was performed using silica gel 60 (0.040-0.063 mm, Merck). Visualization performed by UV light at 254 nm.
- Melting points were obtained on a Gallenkamp melting point apparatus, model MFB-595 in open capillary tubes and were uncorrected.
- 1H-NMR spectra were recorded on a Bruker AMX360 instrument in CDCl3 or DMSO-*d6*, operating at 360 MHz. Chemical shifts are reported in δvalues with respect to residual proton (1H) in the solvent.
- Mass spectra were obtained on a Hewlett-Packard LC/MSD 1100 series instrument in the atmospheric pressure chemical ionization (negative or positive APCI) mode.
- GC/MS measured on a HP 6890 apparatus equipped with HP 5ms column (30 m, 250 μm i.d., 1 μm film thickness) and a HP 5973 mass selective detector.
- HPLC-UV analyses were performed in Shimadzu SCL-10A apparatus consisting of LC10-AT(VP) pumps, an auto injector (S-10AXL), and a dual wavelength UV detector (SPD-10A) set at 215 and 280 nm. Column”30-100-10 LiChrospher  100 x 3 mm, RP-18 (particle size 5 μm), Merck, Cat. No.: 51232”. Separation conducted by gradient elution, Acetonitrile and water were used as eluents.
- Centrifuge VARIFUGE 3.0, Heraeus-Sepatech used.
- Ultrasound cleaning bath Bandelin Sonorex RK 31 used.
- All microwave irradiation experiments were carried out using the Emrys Synthesizer from PersonalChemistry AB (Uppsala). All experiments were carried out in sealed microwave process vials utilizing the standard absorbance level (300 W maximum power). If not stated otherwise, reaction times under microwave conditions reflect total irradiation times counted from the beginning of the irradiation. A detailed description of this single-mode microwave reactor with integrated robotics was recently published.[[1]](#footnote-2)
- Preparation of 1.5 M stock solution of ZnCl2 in THF: ZnCl2 (anhydrous, Merck) in a round-bottomed flask was melted in the flame at 20 mbar for 10-15 minutes. To the cooled, solidified ZnCl2 amagnetic stirring bar and THF were added (100 mL of 0.15 mol of ZnCl2) under argon atmosphere and the mixture stirred till ZnCl2 dissolved.
- If not stated otherwise, all Grignard reagents were prepared by reacting aryl bromides with 1.1 mol equivalents of magnesium in THF at room temperature (RT) by sonication for 20 minutes to afford 1 M solutions.
- Preparation of ca 0.3 M Rieke active zinc solution in THF: [[2]](#footnote-3) A 50 mL Erlenmayer flask equipped with a magnetic stirring bar was loaded with elemental lithium (0.22 g, 32 mmol) and naphthalene (0.4 g, 3.2 mmol). A dropping funnel (ACE, Aldrich, Cat. No.: Z25,676-5) with a PTFE stop-cock was mounted on the flask and a septum with an argon balloon mounted to top of the funnel. Subsequently, 20 mL of THF were added via the septum and the mixture stirred for 45 minutes (after 10 minutes the mixture turned dark green). Then, the dropping funnel was filled with 11 mL (16 mmol) of 1.5 M ZnCl2 in THF and diluted to 30 mL total volume by adding THF to reach a 0.5 M concentration of ZnCl2 solution. The addition of zinc(II)chloride solution took 6 hours. The so obtained Rieke zinc solution of around 0.3 M concentration was used in the following insertion reactions without further work-up.

***All biaryl coupling products were identified/characterized by comparison of 1H NMR and MS data and melting points with data published in the literature (references given).***

**Representative procedure for rapid microwave-assisted preparations of arylzinc halides by Rieke zinc insertion into aryl halides.**

Preparation of 3-methoxyphenylzinc iodide (Table 1, Entry 6):

A 10 mL microwave process vial equipped with a magnetic stirring bar was filled with 3-iodoanisole (176 mg, 0.75 mmol), sealed with a dedicated Teflon coated silicone rubber septum pierced with a thin needle attached to an empty balloon to compensate the pressure created by addition of 5 mL of 0.3 M Rieke zinc (1.5 mmol) with a syringe and needle. The vessel was irradiated for 10 min at 180 °C. After cooling, around 30 μl were taken from the reaction mixture via syringe, and quenched with 1 mL of 10 % HCl. 2 mL of ether were added and a sample was extracted by shaking. This etheral extract was further analysed by GC/MS and gave >99% conversion.

For the other runs described in Table 1, the ether extract was injected into HPLC/UV. The presence of the corresponding arenes arising by quenching of the organozincs with dil. HCl was confirmed by comparison with authenthic materials. In all cases more than 99% HPLC conversion was found.

The sedimentation of the unreacted zinc was accelerated by 5 minutes centrifugation at 3200 rpm and the supernatant arylzinc halide solution was used in the subsequent cross-coupling reactions.

**Representative procedure for Ni catalyzed cross-coupling reactions of aryl chlorides.**

2-cyano-4`-methoxybiphenyl (Table 2, entry 5):[[3]](#footnote-4)

Pre-formation of catalyst Ni(PPh3)dppf.:[[4]](#footnote-5)

NiCl2dppf (24 mg, 0.035 mmol) and triphenylphosphine (18 mg, 0.07 mmol) were placed into a septum-closed test tube under argon atmosphere and 2 mL of THF were added via syringe and needle. *n*BuLi (1.6 M in hexanes, approximately 50 μL, ca 0.07 mmol) was added and the mixture turned dark green. The mixture was subsequently shaken for 1 minute.

Cross-coupling reaction:

A separate reaction test tube was sealed with a septum, 1.1 mL of 4-methoxyphenylmagnesium bromide (1M solution in THF, 1.05 mmol) and 1.4 mL of 1.5 M ZnCl2 in THF (2.1 mmol) were mixed together without the use of inert atmosphere. The mixture was sonicated for 3 minutes and a white precipitate formed.

A 10 mL microwave process vial equipped with a magnetic stirring bar was filled with 2-chlorobenzonitrile (96 mg, 0.7 mmol) and then sealed with a Teflon-coated silicone rubber septum. To this, the above prepared solution of 4-methoxyphenylzinc chloride was added via syringe (with the insoluble magnesium salt). No inert atmosphere was used during the addition. Finally, a solution of the catalyst was added via syringe. The total volume was ca 5 mL.

The vessel was irradiated at 160°C for 3 minutes. Upon irradiation and cooling, the mixture turned black. The reaction content was admixed with silica gel and flash chromatographed by using petroleum ether/EtOAc = 7/1 as eluent. 110 mg (75 % yield) of white powder obtained.

1H NMR (CDCl3): 7.77-7.39 (m, 6H), 7.04 (d, *J* = 8.67 Hz, 2H), 3.88 (s, 3H).

2-Cyano-4`-methoxybiphenyl (Table 2, entry 3) with NMP as cosolvent:

A 10 mL microwave process vial equipped with a magnetic stirring bar was filled with 2-chlorobenzonitrile (96 mg, 0.7 mmol), NiCl2dppf (24 mg, 0.035 mmol) and then sealed with a Teflon-coated silicone rubber septum. A solution of 4-methoxyphenylzinc chloride prepared as above was added via syringe (with the insoluble magnesium salt). No inert atmosphere was used during the addition. 1.7 mL of NMP and 1 mL of THF were added to have a total volume of ca 5 mL. The THF/NMP ratio in all and further mentioned cross-couplings was 2:1 and the total filling volume 5 mL.

After flash column chromatography 118 mg (81 % Yield) of white solid obtained.

**Representative procedure for Pd catalyzed cross-coupling reactions of aryl chlorides.**

4-nitro-2`-methylbiphenyl (Table 3, entry 1):[[5]](#footnote-6)

2-Methylphenylzinc chloride was prepared via Grignard reagent as follows: A test tube was closed via septum, 1.1 mL of 2-methylphenylmagnesium bromide (1 M solution in THF, 1.05 mmol) and 0.75 mL of 1.5 M ZnCl2 in THF (1.1 mmol) were mixed together without the use of inert atmosphere. The mixture was sonicated for 3 minutes and a white precipitate formed. This solution was transferred to the sealed process vial filled with 1-chloro-4-nitrobenzene (110 mg, 0.7 mmol), Pd2(dba)3 (6.4 mg, 0.007 mmol) and *t*Bu3P.HBF4 (8.12 mg, 0.028 mmol) via syringe and needle (with the insoluble magnesium salt) No inert atmosphere was used during the addition. 1.7 mL of NMP and 1.3 mL of THF were added so the total filling volume was 5 mL. The mixture was irradiated at 175 °C for 10 minutes. After irradiation, two layers were formed. The mixture was admixed with silica gel and purified by flash chromatography, gradient elution starting with PE –> PE/EtOAc 7/1. Yield 127 mg (85 % yield) of yellow crystals.

1H NMR (CDCl3): 8.29 (d, *J* = 8.7 Hz, 2H), 7.50 (d, *J* = 8.7, 2H), 7.36-7.21 (m, 4H), 2.27 (s, 3H).

2-Cyano-4`-methylbiphenyl (Table 3, entry 2):5

Preparation of 0.00055 M stock solution of catalyst: Pd2(dba)3 (5.0 mg, 0.0055 mmol) and *t*Bu3P.HBF4 (6.4 mg, 0.022 mmol) were dissolved in 10 mL of THF.

4-Methylphenylzinc chloride was prepared via Grignard reagent as follows: A test tube was closed via septum, 1.1 mL of 4-methylphenylmagnesium bromide (1M solution in THF, 1.05 mmol) and 0.75 mL of 1.5 M ZnCl2 in THF (1.1 mmol) were mixed together without the use of inert atmosphere. The mixture was sonicated for 3 minutes and a white precipitate formed. This solution was transferred to the sealed process vial filled with 2-chlorobenzonitrile (96 mg, 0.7 mmol). 190 μL of the 0.00055 M solution of the catalyst was added together with 1.7 mL of NMP and 1.1 mL THF. The mixture was irradiated at 175 °C for 10 minutes. After cooling, the content was admixed with silica gel and after solvent evaporation flash chromatographed using PE/EtOAc 7/1 as eluent to obtain 122 mg (90 % Yield) of white solid.

1H NMR (CDCl3): 7.78-7.41 (m, 6H), 7.32 (d, *J* = 7.9 Hz, 2H), 2.44 (s, 3H).

4-methoxy-2`-methylbiphenyl (Table 3, entry 3):5

The general procedure was followed with the use of 4-chloroanisole (143 mg, 1 mmol), and *o*-tolylmagnesium bromide (2 mL, 2 mmol).

2-Methylphenylzinc chloride was prepared via Grignard reagent as follows: A test tube was sealed via septum, 2 mL of 2-methylphenylmagnesium bromide (1M solution in THF, 2.0 mmol) and 1.4 mL of 1.5 M ZnCl2 in THF (2.1 mmol) were mixed together without the use of inert atmosphere. The mixture was sonicated for 3 minutes and a white precipitate formed. This solution was transferred to the sealed microwave process vial filled with 4-chloroanisole (143 mg, 1.0 mmol), Pd2(dba)3 (9.0 mg, 0.01 mmol) and *t*Bu3P.HBF4 (12.0 mg, 0.04 mmol) via syringe and needle. 1.7 mL of NMP were added so the total filled volume was 5 mL. The mixture was irradiated at 175 °C for 10 minutes. After irradiation, two layers were formed. The mixture was admixed with silica gel and after evaporation flash chromatographed, gradient elution starting with PE –> PE/EtOAc 10/1. Yield 178 mg (90 % Yield) of colorless liquid.

1H NMR (CDCl3): 7.37-7.26 (m, 6H), 7.00 (d, *J* = 8.73 Hz, 2H), 3.89 (s, 3H), 2.32 (s, 3H).

2-Cyano-3`-methoxybiphenyl (Table 3, entry 4). 5 mL of a solution of 3-methoxyphenylzinc iodide prepared as mentioned above (Table 1, entry 6) were transferred via syringe and needle to the sealed vessel filled with 2-chlorobenzonitrile (52 mg, 0.38 mmol), Pd2(dba)3 (9 mg, 0.0095 mmol) and *t*Bu3P.HBF4 (11 mg, 0.038 mmol). A red solution was formed and irradiated at 175 °C for 10 minutes. After cooling, Pd black was expelled and around 30 μL of a solution was taken and added to a Pasteur pipette filled with silica gel. Elution with 3 mL of ether and analysis by GC-MS demonstrated 64 % conversion.

4-Pyridin-2-yl-benzonitrile (Table 3, entry 5).[[6]](#footnote-7)

Preparation of 0.5 M stock solution of pyridine-2-yl-zinc chloride: 6.9 mL of *n*BuLi (1.6 M in hexanes, 11 mmol) were added dropwise to 2-bromopyridine (1.58 g, 10 mmol) dissolved in 5 mL THF under argon atmosphere keeping the temperature at -78°C. The addition took 1 hour and a black slurry of pyridine-2-yl-lithium was formed. To this mixture, 8 mL of 1.5 M ZnCl2 in THF was added (12 mmol) dropwise keeping the temperature at -78°C. After addition the mixture was warmed up to RT.

With vigorous stirring to assure complete homogeneity, 2.7 mL (1.35 mmol) of this solution was taken via syringe and added to the 4-chlorobenzonitrile (96 mg, 0.7 mmol), Pd2(dba)3 (10.0 mg, 0.0105 mmol) and *t*Bu3P.HBF4 (12.0 mg, 0.042 mmol) placed in the microwave process vial. During the addition of the organozinc no inert gas was necessary. The total volume was formed only by the organozinc solution (2.7 mL). The mixture was irradiated at 175 °C for 10 minutes. After cooling, the mixture was quenched with diluted muriatic acid and the non basic side products extracted with ether. The water solution was made basic with excess of aqueous NaOH to dissolve the zinc hydroxide and extracted again with ether. The combined ether extracts were evaporated and the crude product purified by flash chromatography using PE/EtOAc = 6/1 -> 3/1. 92 mg (73 % yield) of white powder was obtained m.p. 97-98 °C from petroleum ether, (lit.[[7]](#footnote-8) m.p. 97-98 °C from petroleum ether).

1H NMR (CDCl3): 8.74 (d, *J* = 4.38 Hz, 1H), 8.12 (d, *J* = 8.36 Hz, 2H), 7.84-7.76 (m, 4H), 7.34-7.31 (m, 1H).

2-(4-Nitro-phenyl)-pyridine (Table 3, entry 6).[[8]](#footnote-9) An analogous procedure as in the preparation of 4-pyridin-2-yl-benzonitrile (see above, Table 3, entry 5) was followed using 2.7 mL of a 0.5 M solution of pyridine-2-ylzinc chloride (1.35 mmol), 1-chloro-4-nitrobenzene (110 mg, 0.7 mmol), Pd2(dba)3 (10.0 mg, 0.0105 mmol) and *t*Bu3P.HBF4 (12.0 mg, 0.042 mmol).

After flash column chromatography (PE/EtOAc = 1/1) 105 mg (75 % yield) of a yellow solid were obtained.

1H NMR (CDCl3): 8.75 (d, *J* = 4.6 Hz, 1H), 8.33 (d, *J* = 8.81 Hz, 2H), 8.18 (d, *J* = 8.81 Hz, 2H), 7.86-7.80 (m, 2H), 7.36-7.33 (m, 1H).

4-(4-Methoxy-phenyl)-pyridine (Table 3, entry 7).[[9]](#footnote-10)

An analogous procedure as in the case of 4-pyridin-2-yl-benzonitrile (Table 3, entry 5) was followed using of 3 mL of 1M 4-methoxyphenylmagnesium bromide (3 mmol), 2.1 mL of 1.5 M ZnCl2 in THF (3.1 mmol), 150 mg of 4-chloropyridine hydrochloride (1 mmol), Pd2(dba)3 (14.0 mg, 0.015 mmol) and *t*Bu3P.HBF4 (17.0 mg, 0.06 mmol).

After flash column chromatography (PE/EtOAc = 2/1 -> 1/1) 142 mg (77 % yield) of white powder was obtained.

1H NMR (CDCl3): 8.62 (d, *J* = 4.2 Hz, 2H), 7.60 (d, *J* = 8.74, 2H), 7.48 (d, *J* = 4.2 Hz, 2H), 7.01 (d, *J* = 8.74, 2H), 3.87 (s, 3H).

1-*n*Butyl-4-nitro-benzene (Table 3, entry 8).[[10]](#footnote-11) The general representative procedure for Pd catalyzed cross-coupling reactions of aryl chlorides as for 4-nitro-2`-methylbiphenyl (Table 3, entry 1) was followed using 1.25 mL of 1.6 M *n*BuLi in hexanes (2 mmol), 1.4 mL of 1.5 M ZnCl2 in THF (2.1 mmol), 158 mg of 1-chloro-4-nitrobenzene (1 mmol) dissolved in 2.5 mL of THF, Pd2(dba)3 (9.0 mg, 0.01 mmol) and *t*Bu3P.HBF4 (12.0 mg, 0.04 mmol). The mixture was irradiated at 120 °C for 30 minutes. Flash chromatography (PE->PE/EtOAc = 10/1) provided 151 mg (84 % yield) of a colorless liquid.

1H NMR (CDCl3): 8.15 (d, J = 8.63 Hz, 2H), 7.33 (d, J = 8.63 Hz, 2H), 2.73 (t, J = 7.70 Hz, 2H), 1.64 (quintet, J = 7.70 Hz, 7.5 Hz, 2H), 1.39 (sextet, J = 7.5 Hz, 7.3 Hz, 2H), 0.95 (t, J = 7.3 Hz, 3H).

Microwave assisted Grignard reaction with subsequent Kumada reaction.

4-methoxy-2`-methylbiphenyl (Scheme 1):5 A sealed process vial was filled with *p*-bromoanisole (290 mg, 1.55 mmol), magnesium (42 mg, 1.71 mmol), one drop of MeI (5 mg) and 2 mL of THF without the use of inert atmosphere. This mixture was irradiated at 60 °C for 20 minutes. This Grignard reagent was transferred via syringe to a 2nd process vial filled with 2-chlorotoluene (109 mg, 0.86 mmol), Pd2(dba)3 (7.9 mg, 0.0086 mmol) and *t*Bu3P.HBF4 (10 mg, 0.0345 mmol) without the use of inert atmospherel. The mixture was irradiated at 175 °C for 10 minutes. After column chromatography, 161 mg (94 % yield) of a colorless oil of the title compound was obtained identical in all respects with a sample prepared via Negishi reaction (Table 3, entry 3).

**Palladium catalyzed solid phase cross-coupling reactions of aryl chloride.**

Biphenyl-4-carboxylic acid (Table 4, entry 1).[[11]](#footnote-12) 4-Chlorobenzoic acid was attached to Merrifield resin as previously reported,[[12]](#footnote-13) starting from Merrifield resin (Fluka, Cat. No.: 63866, loading 1.7 mequiv of Cl/g). 100 mg of this material (0.144 mmol of C-Cl bonds) was placed into a process vial together with 6.6 mg of Pd2(dba)3 (0.0072 mmol) and 8.4 mg of *t*Bu3P.HBF4 (0.0288 mmol). In another vial, phenylzinc chloride was prepared from phenylmagnesium bromide (0.72 mL, 1 M in THF, 0.72 mmol) and 1.5 M ZnCl2 in THF (0.5 mL, 0.75 mmol). To this organozinc reagent 1.6 mL of NMP were added, the content dissolved and transferred to the process vial containing the starting material together with 2.1 mL of THF to have a total volume 5 mL without the use of inert atmosphere. The mixture was irradiated at 175°C for 10 minutes. Upon cooling the content was filtered and washed with acetone, saturated KCN in DMSO, DMSO, THF and finally with DCM. The resin was transferred to another process vial, where 1.5 mL of DCM and 1.5 mL of trifluoroacetic acid were added. The was mixture irradiated at 160 °C for 5 minutes and then filtered and washed with DCM. The filtrate was evaporated and yielded 53 mg of a white solid. This solid was filtered through a short plug of silica gel, using ether as eluent. Yield: 23 mg (90 % calculated on initial loading) of a white powder (96 % purity by HPLC at (215 nm).

1H NMR (DMSO-d6): 13.00 (s, 0.65 H), 8.03 (d, *J* = 8.21 Hz, 2H), 7.79 (d, *J* = 8.21 Hz, 2H), 7.73 (d, *J* = 7.37 Hz, 2H), 7.52-7.40 (m, 3H).

MS (neg. APCI, *m/z*) calculated mass of C13H10O2: 198, found 197 (100) (M-1).

3'-Methoxy-biphenyl-4-carboxylic acid (Table 4, entry 2).[[13]](#footnote-14) 4-Chlorobenzoic acid was attached to Merrifield resin as in the previously published report,12 starting from Merrifield resin (Nova Biochem, Cat. No.: 01-64-0104, loading 0.84 mequiv Cl/g. 5 mL of a freshly prepared solution of 3-methoxyphenylzinc iodide as described above (Table 1, Entry 6) were added the 4-chlorobenzoic acid attached to Merrifield resin (100 mg, 0.066 mmol C-Cl bonds), Pd2(dba)3 (4.5 mg, 0.0049 mmol) and *t*Bu3P.HBF4 (5.5 mg, 0.019 mmol). The mixture was irradiated at 175 °C for 10 minutes. Work-up as described above provided 13 mg (87 % Yield) of a white powder with HPLC-UV purity of 90 % at 215 nm.

MS (neg. APCI, *m/z*) calculated mass of C14H12O3: 228, found 227.0 (47) (M-1), 183.2 (100).

1. A. Stadler and C. O. Kappe, *J. Comb. Chem.* 2001, **3**, 624.  [↑](#footnote-ref-2)
2. (a) L. Zhu, K. H. Shaughnessy and R. D. Rieke, *Synth. Commun.*, 1993, **23**, 525; (b) R. D. Rieke, M. V. Hanson and J. D. Brown, *J. Org. Chem.*, 1996, **61**, 2726. [↑](#footnote-ref-3)
3. B. Sain and J. S. Sandhu, *J. Org. Chem*., 1990, **55**, 2545. [↑](#footnote-ref-4)
4. In analogy with: (a) S. Saito, S. Oh-tani and N. Miyaura, *J. Org. Chem.,* 1997, **62***,* 8024; (b) S. K. Kim, P. A. Blomgren and B. H. Lipshutz*, Tetrahedron Letters*, 1999, **40**, 197 [↑](#footnote-ref-5)
5. C. Dai and G. C. Fu, *J. Am. Chem. Soc.*, 2001, **123**, 2719. [↑](#footnote-ref-6)
6. T. Cohen and G. L. Deets, *J. Org. Chem.,* 1972, **37**, 55. [↑](#footnote-ref-7)
7. E. C. Butterworth, I. M. Heilbron and D. H. Hey, *J. Chem. Soc.*, 1940, 355. [↑](#footnote-ref-8)
8. A. S. B. Prasad, T. M. Stevenson, J. R. Citineni, V. Nyzam and P. Knochel, *Tetrahedron,* 1997, **53**, 7237. [↑](#footnote-ref-9)
9. E. L. Gall, C. Gosmini, J. Y. Nédélec and J. Périchon, *Tetrahedron*, 2001, **57**, 1923. [↑](#footnote-ref-10)
10. M. Makosza and M. Surowiec, J. Organomet. Chem., 2001, **624**, 167. [↑](#footnote-ref-11)
11. I. O. Kalinonskii, V. V. Pogorelov, A. I. Gelbshtein, N. G. Akhmetov, Russ. J. Gen. Chem. 2001, **71**, 1457. [↑](#footnote-ref-12)
12. A. Stadler and C. O. Kappe, Eur. J. Org. Chem., 2001, 919. [↑](#footnote-ref-13)
13. S. I. Klein, M. Czekaj, C. J. Gardner, K. R. Guenin, D. L. Cheney, *J. Med. Chem*. 1998, **41**, 437. [↑](#footnote-ref-14)
